# Supplementary material for: Pet Attachment and the Interpersonal Theory of Suicide
Source: Atypon-hosted journal article supplement (doi:10.1027/0227-5910/a000822), 2021-08-31
Supplement: 0227-5910_a000822_esm1.pdf [file 0227-5910_a000822_esm1.pdf]

Electronic Supplementary Material 1

Note: Tables are only included if the *N* is 2 or higher for a group and *t*-tests are only calculated if sufficient cell sizes.

Supplementary Table 1

“Does your pet live with you year round?”: Means and *t*-test.

|               | TB               | PB                | Suicide Risk     | Anxious Attachment | Avoidant Attachment | Overall Attachment |
|---------------|------------------|-------------------|------------------|--------------------|---------------------|--------------------|
| <u>Yes</u>    |                  |                   |                  |                    |                     |                    |
| <i>N</i>      | 79               | 80                | 78               | 77                 | 77                  | 47                 |
| <i>M (SD)</i> | 19.24            | 10.26             | 4.51             | 36.05              | 22.56               | 1.86               |
| <u>No</u>     |                  |                   |                  |                    |                     |                    |
| <i>N</i>      | 106              | 105               | 106              | 99                 | 100                 | 71                 |
| <i>M (SD)</i> | 18.92            | 11.16             | 4.49             | 36.16              | 22.52               | 1.86               |
| <u>Total</u>  |                  |                   |                  |                    |                     |                    |
| <i>N</i>      | 185              | 185               | 184              | 176                | 177                 | 118                |
| <i>M (SD)</i> | 19.05            | 10.77             | 4.50             | 36.11              | 22.54               | 1.86               |
| <i>t (df)</i> | 0.25<br>(2, 183) | -1.10<br>(2, 183) | 0.06<br>(2, 182) | -0.06<br>(2, 174)  | 0.04<br>(2, 175)    | 0.002<br>(2, 116)  |

\* denotes  $p < 0.05$

Supplementary Table 2

Means for dog owners.

|               | TB    | PB    | Suicide Risk | Anxious Attachment | Avoidant Attachment | Overall Attachment |
|---------------|-------|-------|--------------|--------------------|---------------------|--------------------|
| <i>N</i>      | 153   | 153   | 152          | 146                | 147                 | 96                 |
| <i>M (SD)</i> | 18.76 | 10.56 | 4.38         | 36.06              | 22.12               | 1.77               |

Supplementary Table 3

Means for cat owners.

|               | TB    | PB    | Suicide Risk | Anxious Attachment | Avoidant Attachment | Overall Attachment |
|---------------|-------|-------|--------------|--------------------|---------------------|--------------------|
| <i>N</i>      | 61    | 62    | 62           | 59                 | 60                  | 39                 |
| <i>M (SD)</i> | 18.75 | 11.02 | 4.84         | 36.41              | 22.37               | 1.92               |

Supplementary Table 4

*Means for fish owners.*

|               | TB    | PB | Suicide Risk | Anxious Attachment | Avoidant Attachment | Overall Attachment |
|---------------|-------|----|--------------|--------------------|---------------------|--------------------|
| <i>N</i>      | 14    | 14 | 14           | 13                 | 12                  | 9                  |
| <i>M (SD)</i> | 17.14 | 11 | 5.50         | 36.54              | 23.67               | 2.15               |

Supplementary Table 5

*Means for lizard owners.*

|               | TB    | PB   | Suicide Risk | Anxious Attachment | Avoidant Attachment | Overall Attachment |
|---------------|-------|------|--------------|--------------------|---------------------|--------------------|
| <i>N</i>      | 6     | 6    | 6            | 3                  | 5                   | 2                  |
| <i>M (SD)</i> | 14.33 | 8.50 | 4.50         | 34                 | 30                  | 1.91               |

Supplementary Table 6

*Means for rodent owners.*

|               | TB    | PB   | Suicide Risk | Anxious Attachment | Avoidant Attachment | Overall Attachment |
|---------------|-------|------|--------------|--------------------|---------------------|--------------------|
| <i>N</i>      | 4     | 4    | 4            | 4                  | 4                   | 3                  |
| <i>M (SD)</i> | 15.25 | 7.25 | 4.25         | 34.25              | 23.50               | 2.22               |

Supplementary Table 7

*Means for "other small mammal" owners.*

|               | TB    | PB    | Suicide Risk | Anxious Attachment | Avoidant Attachment | Overall Attachment |
|---------------|-------|-------|--------------|--------------------|---------------------|--------------------|
| <i>N</i>      | 2     | 3     | 3            | 3                  | 2                   | 3                  |
| <i>M (SD)</i> | 17.50 | 11.67 | 7.33         | 38.67              | 27                  | 1.83               |

Supplementary Table 8

*Means for "other pet" owners.*

|               | TB    | PB   | Suicide Risk | Anxious Attachment | Avoidant Attachment | Overall Attachment |
|---------------|-------|------|--------------|--------------------|---------------------|--------------------|
| <i>N</i>      | 6     | 6    | 6            | 6                  | 6                   | 5                  |
| <i>M (SD)</i> | 11.17 | 8.17 | 4.50         | 36.17              | 16.33               | 1.47               |

Supplementary Table 9

“Are you the primary caretaker for your pet?”: Means and t-tests.

|               | TB               | PB                | Suicide Risk     | Anxious Attachment | Avoidant Attachment | Overall Attachment |
|---------------|------------------|-------------------|------------------|--------------------|---------------------|--------------------|
| <u>Yes</u>    |                  |                   |                  |                    |                     |                    |
| <i>N</i>      | 63               | 63                | 62               | 60                 | 59                  | 41                 |
| <i>M (SD)</i> | 19.73            | 10.70             | 4.53             | 35.75              | 22.42               | 1.89               |
| <u>No</u>     |                  |                   |                  |                    |                     |                    |
| <i>N</i>      | 122              | 122               | 122              | 116                | 118                 | 77                 |
| <i>M (SD)</i> | 18.70            | 10.81             | 4.48             | 36.0               | 22.59               | 1.84               |
| <u>Total</u>  |                  |                   |                  |                    |                     |                    |
| <i>N</i>      | 185              | 185               | 184              | 176                | 177                 | 118                |
| <i>M (SD)</i> | 19.05            | 10.77             | 4.50             | 36.11              | 22.54               | 1.86               |
| <i>t (df)</i> | 0.75<br>(2, 183) | -0.13<br>(2, 183) | 0.13<br>(2, 182) | -0.28<br>(2, 174)  | -0.15<br>(2, 175)   | 0.47<br>(2, 116)   |

\* denotes  $p < 0.05$

Supplementary Table 10

“Are you able to interact with this pet outside of a cage or tank?”: Means.

|               | TB    | PB    | Suicide Risk | Anxious Attachment | Avoidant Attachment | Overall Attachment |
|---------------|-------|-------|--------------|--------------------|---------------------|--------------------|
| <u>Yes</u>    |       |       |              |                    |                     |                    |
| <i>N</i>      | 172   | 172   | 171          | 163                | 166                 | 110                |
| <i>M (SD)</i> | 19.22 | 10.83 | 4.54         | 36.56              | 22.22               | 1.82               |
| <u>No</u>     |       |       |              |                    |                     |                    |
| <i>N</i>      | 7     | 7     | 7            | 7                  | 5                   | 5                  |
| <i>M (SD)</i> | 16.71 | 10.57 | 4.57         | 29.14              | 30                  | 2.56               |
| <u>Total</u>  |       |       |              |                    |                     |                    |
| <i>N</i>      | 179   | 179   | 178          | 170                | 171                 | 115                |
| <i>M (SD)</i> | 19.12 | 10.52 | 4.54         | 36.23              | 22.45               | 1.85               |

Supplementary Table 11

*“Do you believe that having this pet enriches your life?”: Means.*

|               | TB    | PB    | Suicide Risk | Anxious Attachment | Avoidant Attachment | Overall Attachment |
|---------------|-------|-------|--------------|--------------------|---------------------|--------------------|
| <u>Yes</u>    |       |       |              |                    |                     |                    |
| <i>N</i>      | 174   | 174   | 173          | 165                | 167                 | 110                |
| <i>M (SD)</i> | 19.17 | 10.82 | 4.57         | 36.48              | 22.36               | 1.83               |
| <u>No</u>     |       |       |              |                    |                     |                    |
| <i>N</i>      | 3     | 3     | 3            | 3                  | 2                   | 3                  |
| <i>M (SD)</i> | 18.33 | 12.67 | 4            | 33                 | 28.50               | 2.45               |
| <u>Total</u>  |       |       |              |                    |                     |                    |
| <i>N</i>      | 177   | 177   | 176          | 168                | 169                 | 113                |
| <i>M (SD)</i> | 19.15 | 10.86 | 4.56         | 36.42              | 22.44               | 1.85               |

Supplementary Table 12

*“Does this pet cause stress in your day-to-day life?”: Means.*

|               | TB    | PB    | Suicide Risk | Anxious Attachment | Avoidant Attachment | Overall Attachment |
|---------------|-------|-------|--------------|--------------------|---------------------|--------------------|
| <u>Yes</u>    |       |       |              |                    |                     |                    |
| <i>N</i>      | 18    | 18    | 17           | 16                 | 17                  | 11                 |
| <i>M (SD)</i> | 17.67 | 9.94  | 3.94         | 35.44              | 24.41               | 2.20               |
| <u>No</u>     |       |       |              |                    |                     |                    |
| <i>N</i>      | 161   | 161   | 161          | 154                | 154                 | 104                |
| <i>M (SD)</i> | 19.29 | 10.91 | 4.61         | 36.64              | 22.23               | 1.82               |
| <u>Total</u>  |       |       |              |                    |                     |                    |
| <i>N</i>      | 179   | 179   | 178          | 170                | 171                 | 115                |
| <i>M (SD)</i> | 19.13 | 10.82 | 4.54         | 36.25              | 22.45               | 1.85               |

Supplementary Table 13:

“Do you consider your pet to be a part of your family?”: Means.

|               | TB    | PB    | Suicide Risk | Anxious Attachment | Avoidant Attachment | Overall Attachment |
|---------------|-------|-------|--------------|--------------------|---------------------|--------------------|
| <u>Yes</u>    |       |       |              |                    |                     |                    |
| <i>N</i>      | 177   | 177   | 176          | 169                | 169                 | 113                |
| <i>M (SD)</i> | 19.21 | 10.56 | 4.56         | 36.33              | 22.36               | 1.84               |
| <u>No</u>     |       |       |              |                    |                     |                    |
| <i>N</i>      | 2     | 2     | 2            | 1                  | 2                   | 2                  |
| <i>M (SD)</i> | 11    | 7     | 3            |                    | 30                  | 2.52               |
| <u>Total</u>  |       |       |              |                    |                     |                    |
| <i>N</i>      | 179   | 179   | 178          | 170                | 171                 | 115                |
| <i>M (SD)</i> | 8.83  | 5.55  | 2.36         | 12.24              | 7.14                | 0.57               |

Supplementary Table 14

“Do you worry about the financial aspect of caring for your pet?”: Means and *t*-test.

|               | TB       | PB        | Suicide Risk | Anxious Attachment | Avoidant Attachment | Overall Attachment |
|---------------|----------|-----------|--------------|--------------------|---------------------|--------------------|
| <u>Yes</u>    |          |           |              |                    |                     |                    |
| <i>N</i>      | 27       | 27        | 26           | 25                 | 24                  | 18                 |
| <i>M (SD)</i> | 21.37    | 12.89     | 5.77         | 39.96              | 22.96               | 1.56               |
| <u>No</u>     |          |           |              |                    |                     |                    |
| <i>N</i>      | 151      | 151       | 151          | 144                | 147                 | 97                 |
| <i>M (SD)</i> | 18.76    | 10.48     | 4.34         | 35.77              | 22.37               | 1.91               |
| <u>Total</u>  |          |           |              |                    |                     |                    |
| <i>N</i>      | 178      | 178       | 177          | 169                | 171                 | 115                |
| <i>M (SD)</i> | 19.15    | 10.84     | 4.55         | 36.39              | 22.45               | 1.85               |
| <i>t (df)</i> | 1.14     | 2.10      | 2.89         | 1.60               | 0.38                | -2.48              |
|               | (2, 176) | (2, 176)* | (2, 175)*    | (2, 167)           | (2, 169)            | (2, 113)*          |

\* denotes  $p < 0.05$

Supplementary Table 15

*Gender Means and t-tests.*

|               | TB               | PB               | Suicide Risk      | Anxious Attachment | Avoidant Attachment | Overall Attachment |
|---------------|------------------|------------------|-------------------|--------------------|---------------------|--------------------|
| <u>Male</u>   |                  |                  |                   |                    |                     |                    |
| <i>N</i>      | 71               | 70               | 71                | 67                 | 70                  | 40                 |
| <i>M (SD)</i> | 19.04            | 11.40            | 4.51              | 34.69              | 24.84               | 1.96               |
| <u>Female</u> |                  |                  |                   |                    |                     |                    |
| <i>N</i>      | 113              | 114              | 112               | 108                | 106                 | 77                 |
| <i>M (SD)</i> | 18.92            | 10.27            | 4.48              | 36.99              | 21                  | 1.80               |
| <u>Total</u>  |                  |                  |                   |                    |                     |                    |
| <i>N</i>      | 185              | 185              | 184               | 176                | 177                 | 118                |
| <i>M (SD)</i> | 19.05            | 10.77            | 4.50              | 36.11              | 22.54               | 1.86               |
| <i>t (df)</i> | 0.09<br>(2, 182) | 1.37<br>(2, 182) | 0.07<br>(2, 1811) | -1.21<br>(2, 173)  | 3.65<br>(2, 174)*   | 1.50<br>(2, 115)   |

\* denotes  $p < 0.05$
